# Supplementary material for: Gang Membership, Violence, and Psychiatric Morbidity
Source: Atypon-hosted journal article supplement (doi:10.1176/appi.ajp.2013.12091188), 2013-07-12
Supplement: 985_ds001.pdf [file 985_ds001.pdf]

**TABLE S1. Identification of Potential Explanatory Variables for Psychopathology and Service Use**

|                                      | Attitudes towards violence        |                                   | Victimization                    |                                  | Characteristics of violent behavior |                                  |                                    |                                    |
|--------------------------------------|-----------------------------------|-----------------------------------|----------------------------------|----------------------------------|-------------------------------------|----------------------------------|------------------------------------|------------------------------------|
|                                      | Violent if disrespected           | Violent ruminations               | Fear of violent victimization    | Victim of violence               | Conviction for violence             | No. of violent incidents         | Instrumental violence              | Excited by violence                |
|                                      | AOR (95% CI)                      | AOR (95% CI)                      | AOR (95% CI)                     | AOR (95% CI)                     | AOR (95% CI)                        | AOR (95% CI)                     | AOR (95% CI)                       | AOR (95% CI)                       |
| <b>Psychopathology</b> <sup>1)</sup> |                                   |                                   |                                  |                                  |                                     |                                  |                                    |                                    |
| Psychosis                            | 1.56<br>(0.84-2.93)               | 3.73<br>(2.07-6.74) <sup>#</sup>  | 2.19<br>(1.30-3.69) <sup>‡</sup> | 2.03<br>(1.09-3.79) <sup>†</sup> | 0.88<br>(0.43-1.81)                 | 1.57<br>(1.22-2.02) <sup>#</sup> | 1.88<br>(0.89-3.99)                | 1.81<br>(0.94-3.49)                |
| Anxiety disorder                     | 1.37<br>(0.99-1.90)               | 1.99<br>(1.34-2.97) <sup>#</sup>  | 2.94<br>(2.18-3.97) <sup>#</sup> | 1.67<br>(1.27-2.19) <sup>#</sup> | 1.06<br>(0.71-1.58)                 | 1.17<br>(1.04-1.31) <sup>‡</sup> | 1.81<br>(1.09-3.02) <sup>†</sup>   | 1.27<br>(0.73-2.20)                |
| Depression                           | 0.80<br>(0.55-1.15)               | 1.08<br>(0.59-1.95)               | 1.29<br>(0.90-1.84)              | 0.85<br>(0.60-1.20)              | 1.42<br>(0.84-2.39)                 | 0.65<br>(0.55-0.78) <sup>#</sup> | 1.29<br>(0.44-3.74)                | 0.69<br>(0.31-1.52)                |
| Alcohol dependence                   | 1.25<br>(0.88-1.78)               | 1.64<br>(1.10-2.43) <sup>†</sup>  | 1.30<br>(0.92-1.85)              | 1.02<br>(0.72-1.46)              | 1.85<br>(1.19-2.90) <sup>‡</sup>    | 1.30<br>(1.14-1.49) <sup>#</sup> | 2.54<br>(1.45-4.45) <sup>‡</sup>   | 2.38<br>(1.47-3.85) <sup>#</sup>   |
| Drug dependence                      | 3.33<br>(1.50-7.37) <sup>‡</sup>  | 2.37<br>(1.40-4.01) <sup>‡</sup>  | 2.72<br>(1.39-5.30) <sup>‡</sup> | 2.32<br>(1.35-4.01) <sup>‡</sup> | 1.91<br>(1.02-3.57) <sup>†</sup>    | 1.23<br>(0.94-1.60)              | 3.88<br>(2.16-6.96) <sup>#</sup>   | 4.19<br>(1.71-10.26) <sup>‡</sup>  |
| Antisocial personality disorder      | 8.59<br>(6.55-11.28) <sup>#</sup> | 7.60<br>(5.54-10.43) <sup>#</sup> | 1.13<br>(0.84-1.54)              | 3.66<br>(2.83-4.72) <sup>#</sup> | 12.10<br>(8.36-17.52) <sup>#</sup>  | 2.64<br>(2.36-2.94) <sup>#</sup> | 13.28<br>(8.16-21.62) <sup>#</sup> | 10.55<br>(6.70-16.61) <sup>#</sup> |
| Suicide attempt                      | 1.89<br>(1.27-2.83) <sup>‡</sup>  | 2.81<br>(1.71-4.62) <sup>#</sup>  | 1.51<br>(1.00-2.29) <sup>†</sup> | 2.75<br>(1.88-4.03) <sup>#</sup> | 1.67<br>(1.03-2.72) <sup>†</sup>    | 1.44<br>(1.24-1.67) <sup>#</sup> | 1.09<br>(0.57-2.08)                | 1.54<br>(0.83-2.84)                |
| <b>Service use</b> <sup>2)</sup>     |                                   |                                   |                                  |                                  |                                     |                                  |                                    |                                    |
| Consulted medical practitioner       | 1.05<br>(0.71-1.55)               | 1.68<br>(0.98-2.87)               | 1.40<br>(0.90-2.18)              | 1.49<br>(1.02-2.18) <sup>†</sup> | 0.99<br>(0.95-1.65)                 | 1.12<br>(0.97-1.30)              | 1.47<br>(0.75-2.89)                | 0.71<br>(0.29-1.72)                |
| Consulted psychiatrist/psychologist  | 1.81<br>(0.90-3.64)               | 2.20<br>(0.99-4.89)               | 2.85<br>(1.54-5.27) <sup>#</sup> | 2.25<br>(1.23-4.09) <sup>‡</sup> | 0.84<br>(0.40-1.80)                 | 1.27<br>(1.01-1.59) <sup>†</sup> | 1.90<br>(0.72-5.02)                | 2.50<br>1.02-6.10) <sup>†</sup>    |
| Psychiatric admission                | 1.19<br>(0.71-2.01)               | 2.10<br>(1.12-3.95) <sup>†</sup>  | 2.15<br>(1.23-3.77) <sup>‡</sup> | 1.86<br>(1.00-3.46) <sup>†</sup> | 1.71<br>(0.89-3.30)                 | 1.25<br>(1.04-1.50) <sup>†</sup> | 2.83<br>(1.48-5.41) <sup>‡</sup>   | 1.79<br>(0.91-3.52)                |
| Psychotropic medication              | 1.19<br>(0.68-2.08)               | 0.97<br>(0.48-1.94)               | 2.35<br>(1.40-3.94) <sup>‡</sup> | 1.40<br>(0.80-2.45)              | 2.02<br>(1.08-3.77) <sup>†</sup>    | 1.09<br>(0.89-1.34)              | 0.90<br>(0.35-2.29)                | 1.27<br>(0.49-3.30)                |

Note. <sup>†</sup> P<0.05; <sup>‡</sup> P<0.01; <sup>#</sup> P<0.001. <sup>1)</sup> Adjustments were made for all other psychiatric morbidity outcomes (except suicide attempt), non-UK birth, being single, unemployment, ethnicity, age, Index of Multiple Deprivation, and survey type. <sup>2)</sup> Adjustments as in <sup>1)</sup> and simultaneous inclusion of all service use variables.

**TABLE S2. Testing Explanations for the Link Between Gang Membership, Violence, and Psychopathology and Service Use: Gang Members vs. Violent Men**

|                                         | Baseline               | Violent if disrespected |    | Violent ruminations    |    | Fear of victimization  |    | Victim of violence     |    |
|-----------------------------------------|------------------------|-------------------------|----|------------------------|----|------------------------|----|------------------------|----|
|                                         | OR (95% CI)            | OR (95% CI)             | %  | OR (95% CI)            | %  | OR (95% CI)            | %  | OR (95% CI)            | %  |
| Depression                              | 0.27<br>(0.08-0.89) †  | -                       |    | -                      |    | -                      |    | -                      |    |
| Alcohol dependence                      | 3.97<br>(1.90-8.30) #  | -                       |    | 3.24<br>(1.39-7.55) ‡  | 15 | -                      |    | -                      |    |
| Drug dependence                         | 9.06<br>(3.60-22.83) # | 6.38<br>(2.47-16.46) #  | 16 | 7.97<br>(2.71-23.41) # | 6  | 8.33<br>(3.30-21.04) # | 4  | 8.84<br>(3.57-21.90) # | 1  |
| Antisocial personality disorder         | 6.49<br>(2.73-15.43) # | 6.14<br>(2.24-16.82) #  | 3  | 6.03<br>(2.12-17.16) # | 4  | -                      |    | 6.99<br>(2.95-16.57) # | -4 |
| Suicide attempt                         | 3.94<br>(2.34-6.63) #  | 3.27<br>(1.90-5.61) #   | 14 | 2.16<br>(1.21-3.86) ‡  | 44 | 2.66<br>(1.52-4.63) #  | 29 | 3.60<br>(2.09-6.20) #  | 7  |
| Consulted medical practitioner          | 2.25<br>(1.21-4.18) ‡  | -                       |    | -                      |    | -                      |    | 2.09<br>(1.10-3.95) †  | 9  |
| Consulted psychiatrist/<br>psychologist | 2.86<br>(1.29-6.32) ‡  | -                       |    | -                      |    | 1.48<br>(0.57-3.82)    | 63 | 2.46<br>(1.09-5.54) †  | 14 |
| Psychiatric admission                   | 3.53<br>(1.67-7.46) #  | -                       |    | 3.09<br>(1.40-6.81) ‡  | 10 | 1.76<br>(0.79-3.90)    | 55 | 3.22<br>(1.50-6.94) ‡  | 7  |
| Psychotropic medication                 | 2.45<br>(1.11-5.41) †  | -                       |    | -                      |    | 1.51<br>(0.65-3.48)    | 54 | -                      |    |

*Note.* % Percentage change in beta coefficient (beta=log(OR)) from baseline model to final adjusted model. All 95% CI are computed using robust standard errors to account for correlations within survey areas due to clustering within postcodes. † P<0.05; ‡ P<0.01; # P<0.001.

**TABLE S3. Testing Explanations for the Link Between Gang Membership, Violence, and Psychopathology and Service Use: Gang Members vs. violent Men (continued)**

|                                     | Conviction for violence |    | Number of violent incidents |     | Excited by violence    |    | Instrumental violence  |    | Final model            |     |
|-------------------------------------|-------------------------|----|-----------------------------|-----|------------------------|----|------------------------|----|------------------------|-----|
|                                     | OR (95% CI)             | %  | OR (95% CI)                 | %   | OR (95% CI)            | %  | OR (95% CI)            | %  | OR (95% CI)            | %   |
| Depression                          | -                       |    | 0.22<br>(0.06-0.80) †       | -36 | -                      |    | -                      |    | 0.22<br>(0.06-0.80) †  | -36 |
| Alcohol dependence                  | 3.82<br>(1.82-7.99) #   | 3  | 4.45<br>(2.02-9.81) #       | -8  | 3.18<br>(1.38-7.33) ‡  | 16 | 3.15<br>(1.46-6.81) ‡  | 17 | 3.29<br>(1.12-9.65) †  | 14  |
| Drug dependence                     | 8.63<br>(3.36-22.16) #  | 2  | -                           |     | 6.41<br>(2.31-17.80) # | 16 | 6.09<br>(2.14-17.33) # | 18 | 4.04<br>(1.17-13.91) † | 37  |
| Antisocial personality disorder     | 5.30<br>(2.07-13.55) #  | 11 | 5.22<br>(1.84-14.82) ‡      | 12  | 5.09<br>(1.98-13.12) # | 13 | 4.22<br>(1.64-10.84) ‡ | 23 | 1.67<br>(0.34-8.17)    | 73  |
| Suicide attempt                     | -                       |    | 3.54<br>(2.04-6.13) #       | 8   | -                      |    | -                      |    | 1.27<br>(0.60-2.69)    | 82  |
| Consulted medical practitioner      | -                       |    | -                           |     | -                      |    | -                      |    | 2.09<br>(1.10-3.95) †  | 9   |
| Consulted psychiatrist/psychologist | -                       |    | 2.26<br>(1.09-4.70) †       | 22  | 1.93<br>(0.91-4.10)    | 37 | -                      |    | 0.50<br>(0.17-1.48)    | 166 |
| Psychiatric admission               | -                       |    | 3.32<br>(1.48-7.45) ‡       | 5   | -                      |    | 2.22<br>(0.90-5.48)    | 37 | 1.59<br>(0.48-5.26)    | 63  |
| Psychotropic medication             | 2.18<br>(0.94-5.03)     | 13 | -                           |     | -                      |    | -                      |    | 1.34<br>(0.56-3.22)    | 68  |

*Note.* % Percentage change in beta coefficient (beta=log(OR)) from baseline model to final adjusted model. All 95% CI are computed using robust standard errors to account for correlations within survey areas due to clustering within postcodes. † P<0.05; ‡ P<0.01; # P<0.001.
